# Supplementary material for: Heart-Cutting Bidimensional Liquid Chromatography for the Simultaneous Analysis of Veterinary Drugs Residues and Nucleotides Monophosphate in Sheep’s Milk
Source: Preprints.org preprint supplement (doi:10.20944/preprints202403.0565.v1), 2024-03-11
Supplement: Supplementary file 1 [file supplementary]

**Table S2**

Chemical structure, ionization constant, octanol–water partition coefficient and number of proton donors and acceptors for the veterinary drugs and monophosphate nucleotides.

| **Compound name** | **Structure** | **MWa (g/mol)b** | **pKab** | **Log Pb** | **Hydrogen**  **Donors/Acceptorsc** |
| --- | --- | --- | --- | --- | --- |
| Trimethoprim (TMP) | 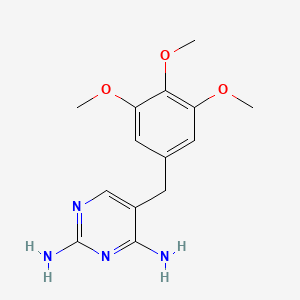 | 290.32 | 7.04 | 0.594 | 2/7 |
| Albendazole 2-amino sulfone (ANH2) | 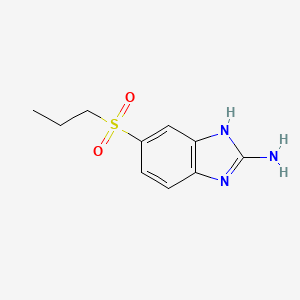 | 239.30 | 9.90 | 0.858 | 2/4 |
| Enrofloxacin (ERF) | 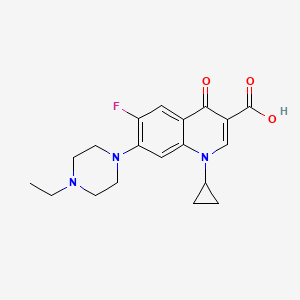 | 359.4 | 6.43 | 2.306 | 1/7 |
| Ciprofloxacin (CPF) | 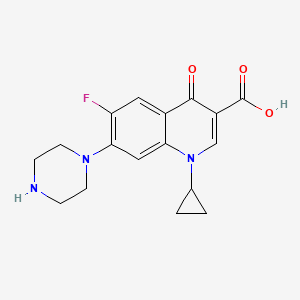 | 331.34 | 6.43 | 1.625 | 2/7 |
| Albendazole sulfoxide (ASO) | 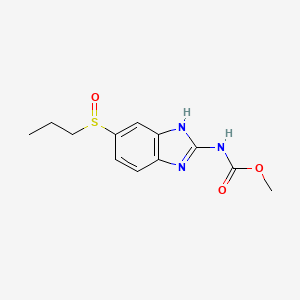 | 281.33 | 10.05 | 0.676 | 2/5 |
| Albendazole sulfone (ASO2) | 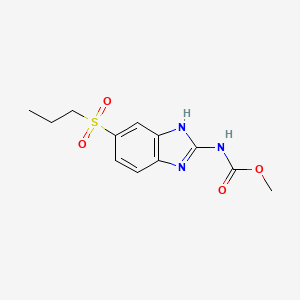 | 297.33 | 10.11 | 1.227 | 2/5 |
| Cytidine 5′-monophosphate (CMP)c | 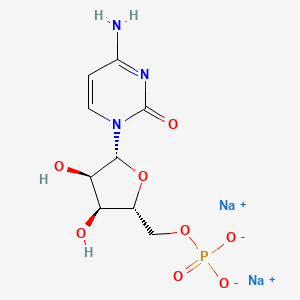 | 367.16 | 1.86 | -5.134 | 3/8 |
| Adenosine 5′-monophosphate (AMP)c | 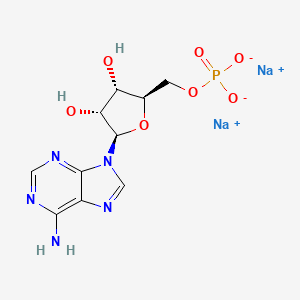 | 391.19 | 1.86 | -3.190 | 3/11 |
| Inosine 5′-monophosphate (IMP)c | 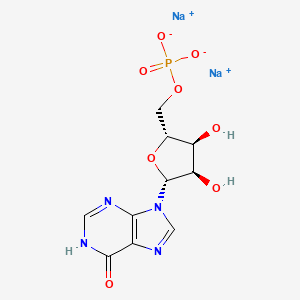 | 392.17 | 1.86 | -4.227 | 3/10 |
| Uridine 5′-monophosphate (UMP) | 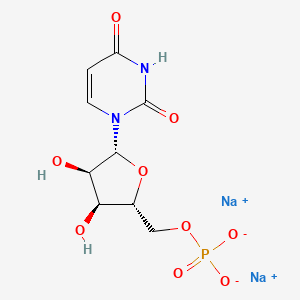 | 368.14 | 1.86 | -3.452 | 3/9 |
| Guanosine 5′-monophosphate (GMP) | 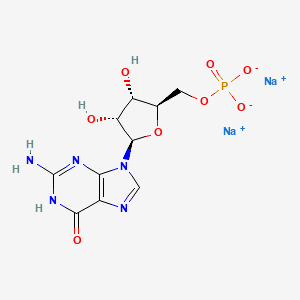 | 407.18 | 1.86 | -4.067 | 4/10 |

Mw: molecular weight. b: Calculated using Advanced Chemistry Development (ACD/Labs) Software V11.02 (© 1994-2023 ACD/Labs). C: Data obtained from PubChem (<https://pubchem.ncbi.nlm.nih.gov/>)
